# Supplementary material
Source: publisher figshare collection journal article supplement (https://gsajournals.figshare.com/articles/dataset/_/11676441)

Figure S4: Distribution of the top base-pair composition of microsatellite motifs in the *M. melodia* genome.

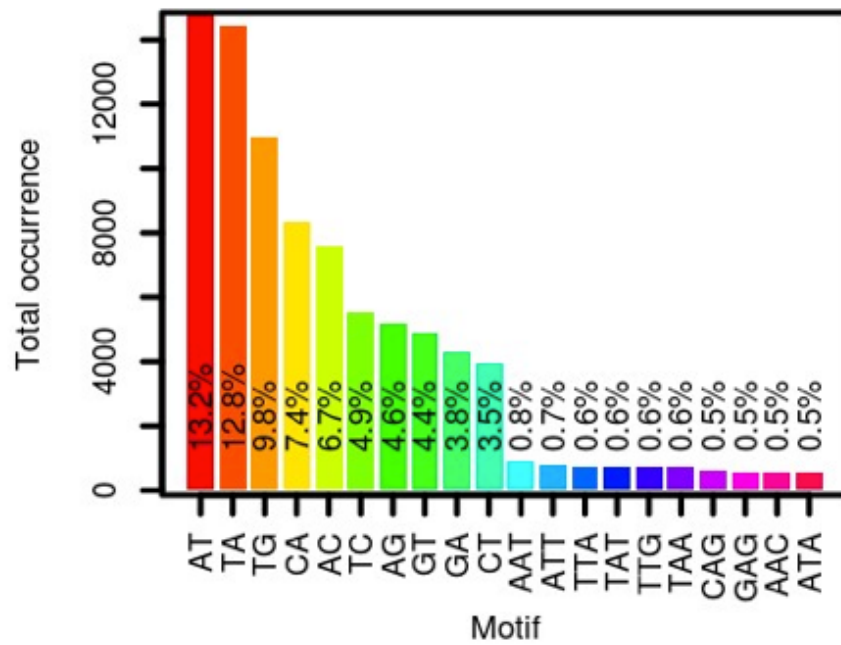

Supplement: Supplementary file 1 [file 1]
