# Supplementary material
Source: publisher figshare collection journal article supplement (https://gsajournals.figshare.com/articles/dataset/_/11676441)

**Distribution of the percentage of annotated gene models with their AED scores**

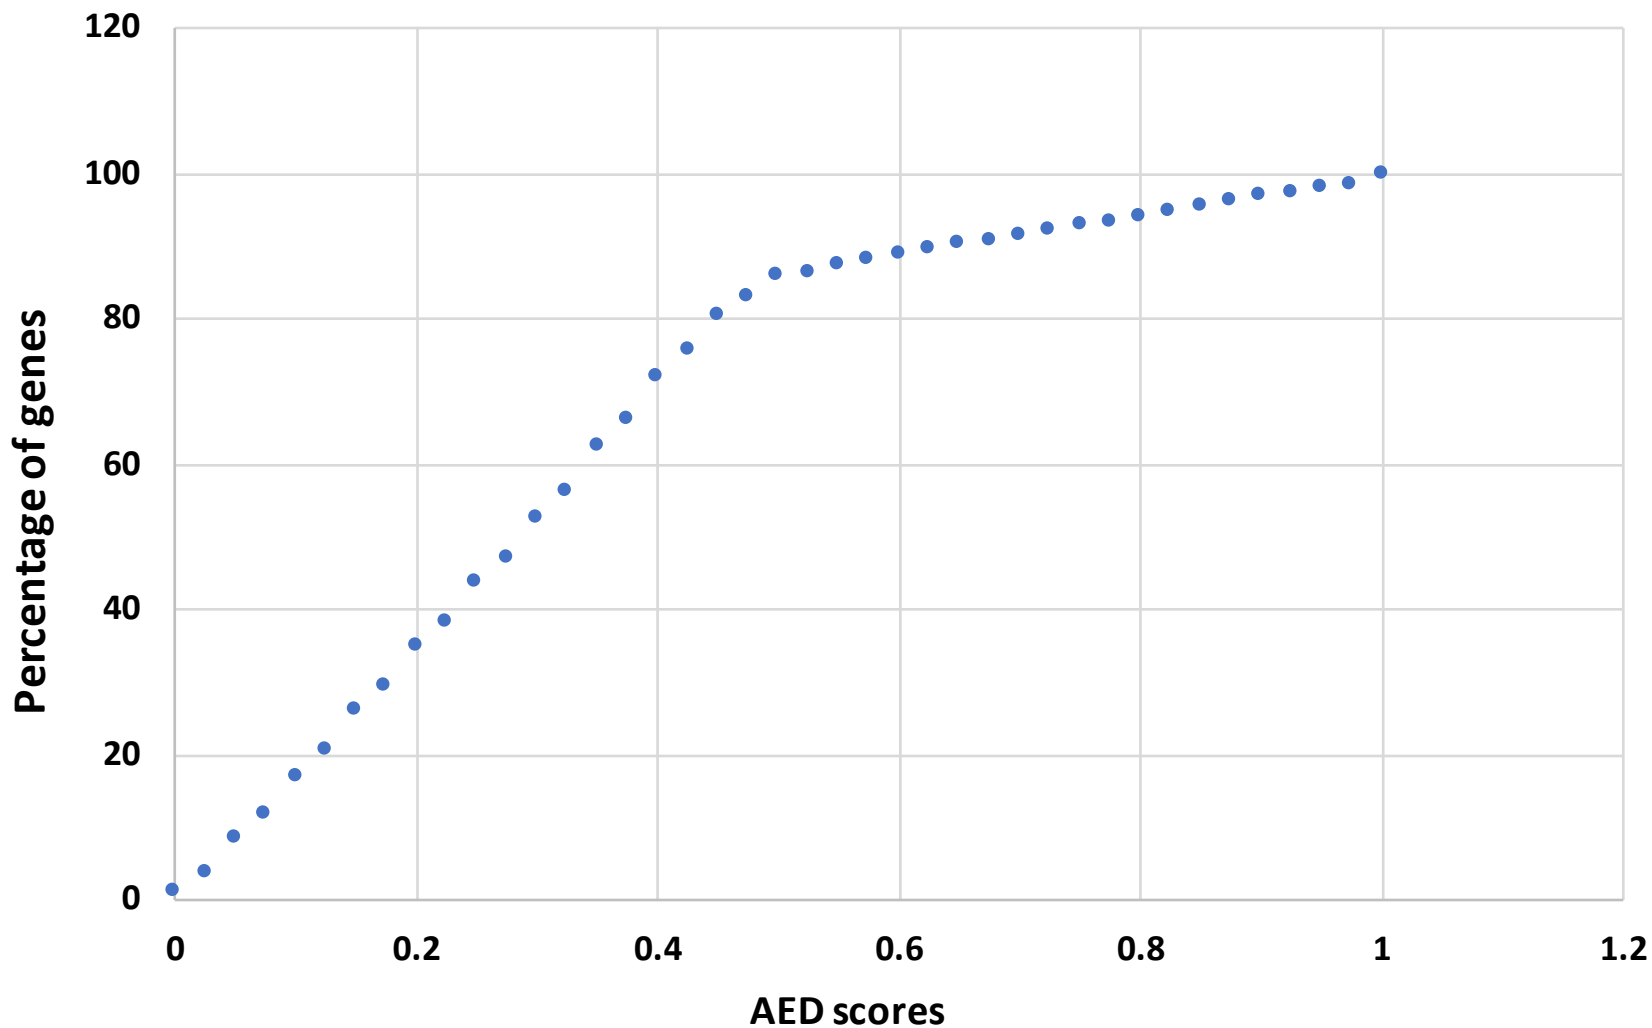

Supplement: Supplementary file [file 1]
